# Supplementary material
Source: PubMed Central journal article supplement (PMC4291483)

## Supplementary Table S1

| $\alpha$ -STIL IP | Sequence Coverage(%) | Total Peptides Number | Unique Peptides Number |
|-------------------|----------------------|-----------------------|------------------------|
| RBM14 HeLa        | 18                   | 11                    | 9                      |
| RBM14 293T        | 9.5                  | 6                     | 4                      |
| STIL HeLa         | 28                   | 97                    | 28                     |
| STIL 293T         | 24                   | 44                    | 23                     |

\* No peptide of RBM14 or STIL was found in IP samples with control rabbit IgG

|    | Candidates for STIL-interacting proteins                  | Cells | Sequence     | Total Peptides | Unique Peptides |
|----|-----------------------------------------------------------|-------|--------------|----------------|-----------------|
|    |                                                           |       | Coverage (%) | Number         | Number          |
| 1  | h-SMRT of nuclear receptor corepressor 2, NCOR2           | HeLa  | 13           | 71             | 31              |
|    |                                                           | 293T  | 7.2          | 14             | 14              |
| 2  | Cleavage stimulation factor subunit 3, CSTF3              | HeLa  | 18           | 38             | 13              |
|    |                                                           | 293T  | 27           | 31             | 16              |
| 3  | F-box-like/WD repeat-containing protein, TBL1XR1          | HeLa  | 24           | 33             | 15              |
|    |                                                           | 293T  | 4.9          | 4              | 2               |
| 4  | RNA-binding protein 14, RBM14                             | HeLa  | 18           | 11             | 9               |
|    |                                                           | 293T  | 9.5          | 6              | 4               |
| 5  | SAM domain and HD-domain-containing protein 1, SAMHD1     | HeLa  | 15           | 9              | 9               |
|    |                                                           | 293T  | 9.3          | 5              | 5               |
| 6  | Lon protease homolog, mitochondrial, LONP1                | HeLa  | 14           | 23             | 13              |
| 7  | Calmodulin-regulated spectrin-associated protein, CAMSAP1 | HeLa  | 4.8          | 13             | 8               |
| 8  |                                                           | HeLa  | 1.5          | 6              | 6               |
| 9  | E3 ubiquitin-protein ligase, HERC2                        | HeLa  | 23           | 4              | 4               |
| 10 | Histone H1.4                                              | 293T  | 24           | 25             | 6               |
| 11 |                                                           | 293T  | 5.3          | 3              | 3               |

  

|    | Candidates for HsSAS-6-interacting proteins                      | Cells | Sequence     | Total Peptides | Unique Peptides |
|----|------------------------------------------------------------------|-------|--------------|----------------|-----------------|
|    |                                                                  |       | Coverage (%) | Number         | Number          |
| 1  | Lysine-specific histone demethylase 1A, KDM1A                    | HeLa  | 30           | 22             | 21              |
|    |                                                                  | 293T  | 20           | 13             | 12              |
| 2  | Rho GTPase-activating protein 17, ARHGAP17                       | HeLa  | 30           | 20             | 17              |
|    |                                                                  | 293T  | 35           | 63             | 24              |
| 3  | Nucleolar RNA helicase 2, DDX21                                  | HeLa  | 17           | 10             | 10              |
| 4  |                                                                  | HeLa  | 23           | 18             | 13              |
|    | YTH domain family protein 1, YTHDF1                              | 293T  | 29           | 35             | 13              |
| 5  |                                                                  | HeLa  | 26           | 7              | 7               |
|    | REST corepressor 1, RCOR1                                        | 293T  | 11           | 4              | 4               |
| 6  |                                                                  | 293T  | 8.7          | 19             | 6               |
| 7  | Rho GTPase activating protein, RICH2                             | 293T  | 15           | 6              | 6               |
| 8  | RUv-B like 2, RUVBL2                                             | 293T  | 13           | 8              | 7               |
| 9  | Cleavage and Polyadenylation specificity factor subunit 3, CPSF3 | 293T  | 3.7          | 3              | 3               |
| 10 | Sister chromatid cohesion protein, PDS5A                         | 293T  | 10           | 3              | 3               |
|    | alpha-centractin ACTR1A                                          | 293T  |              |                |                 |

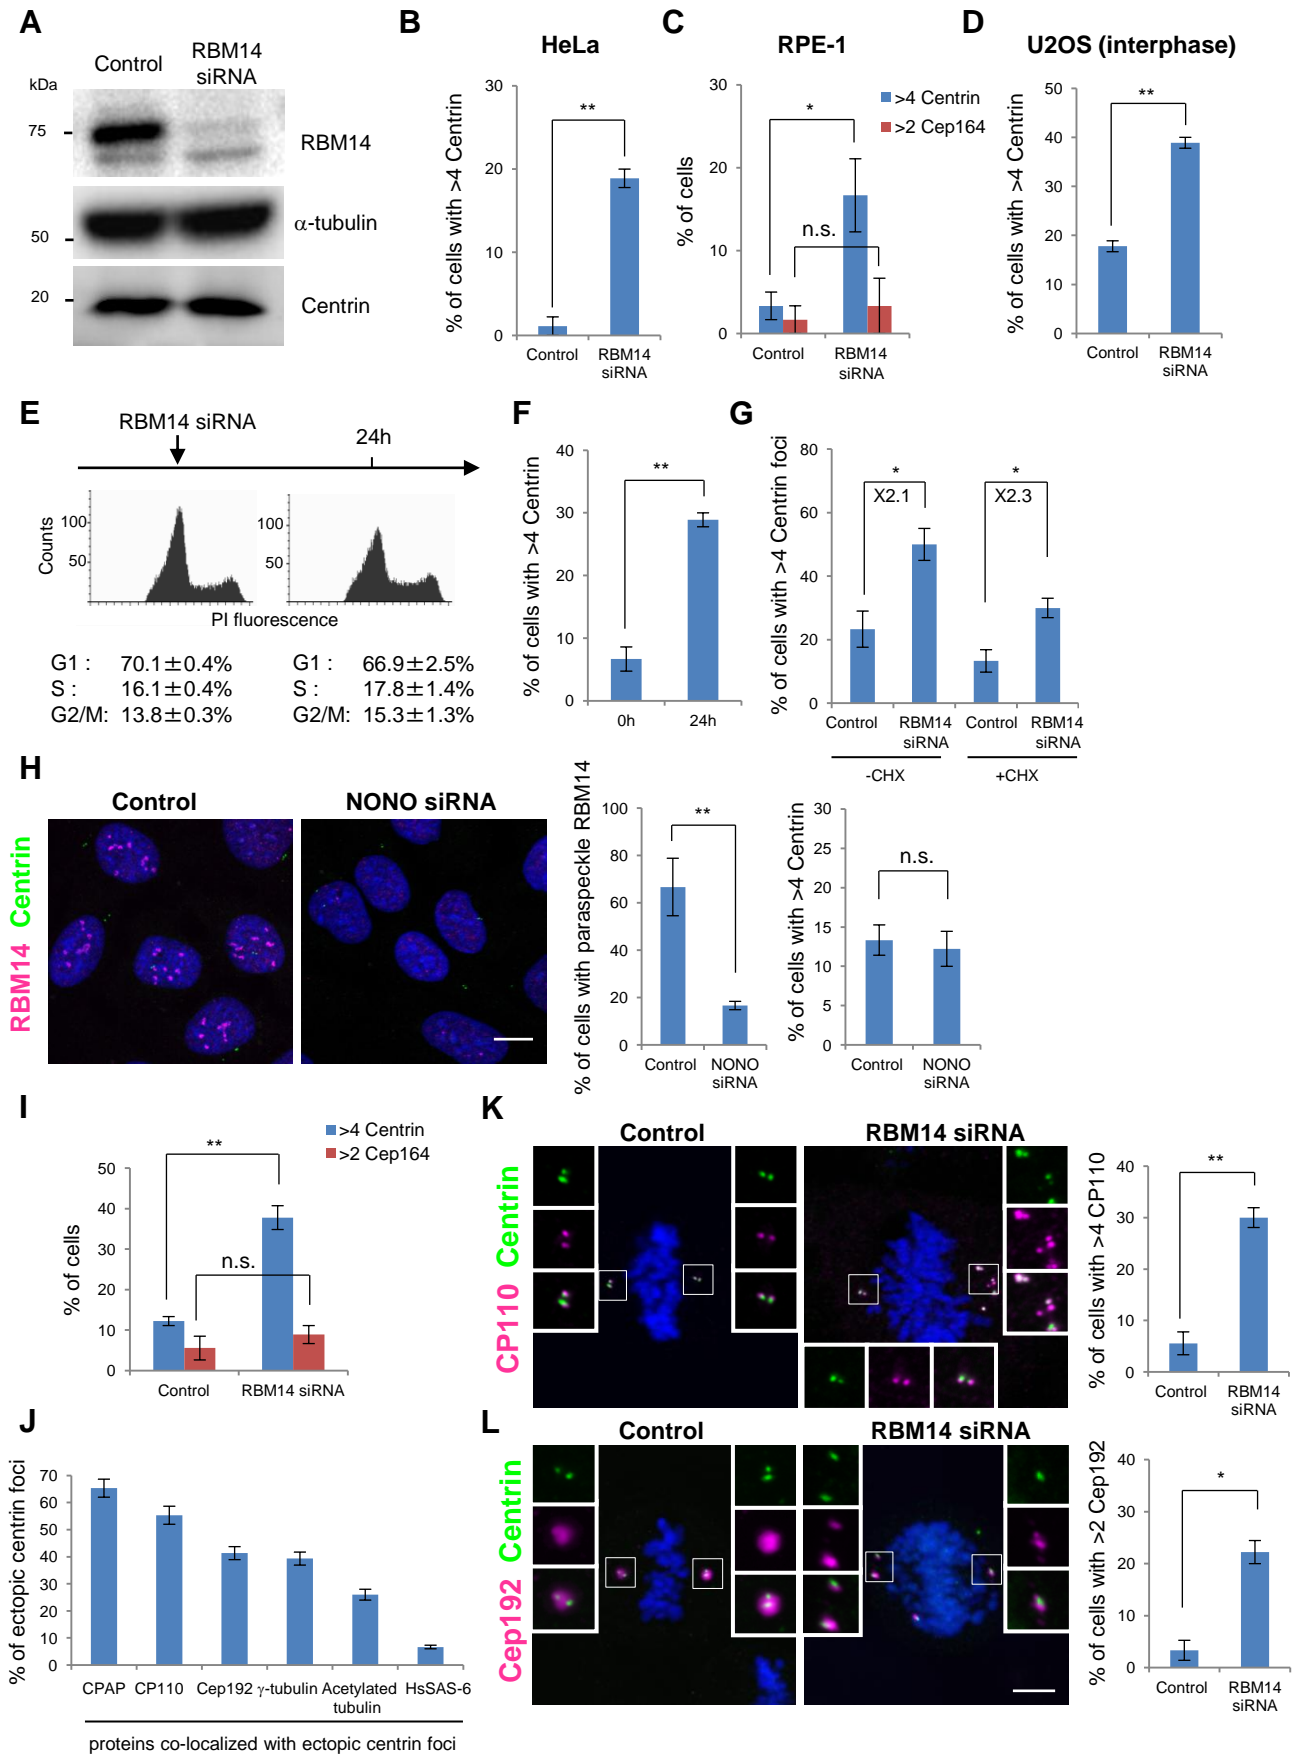

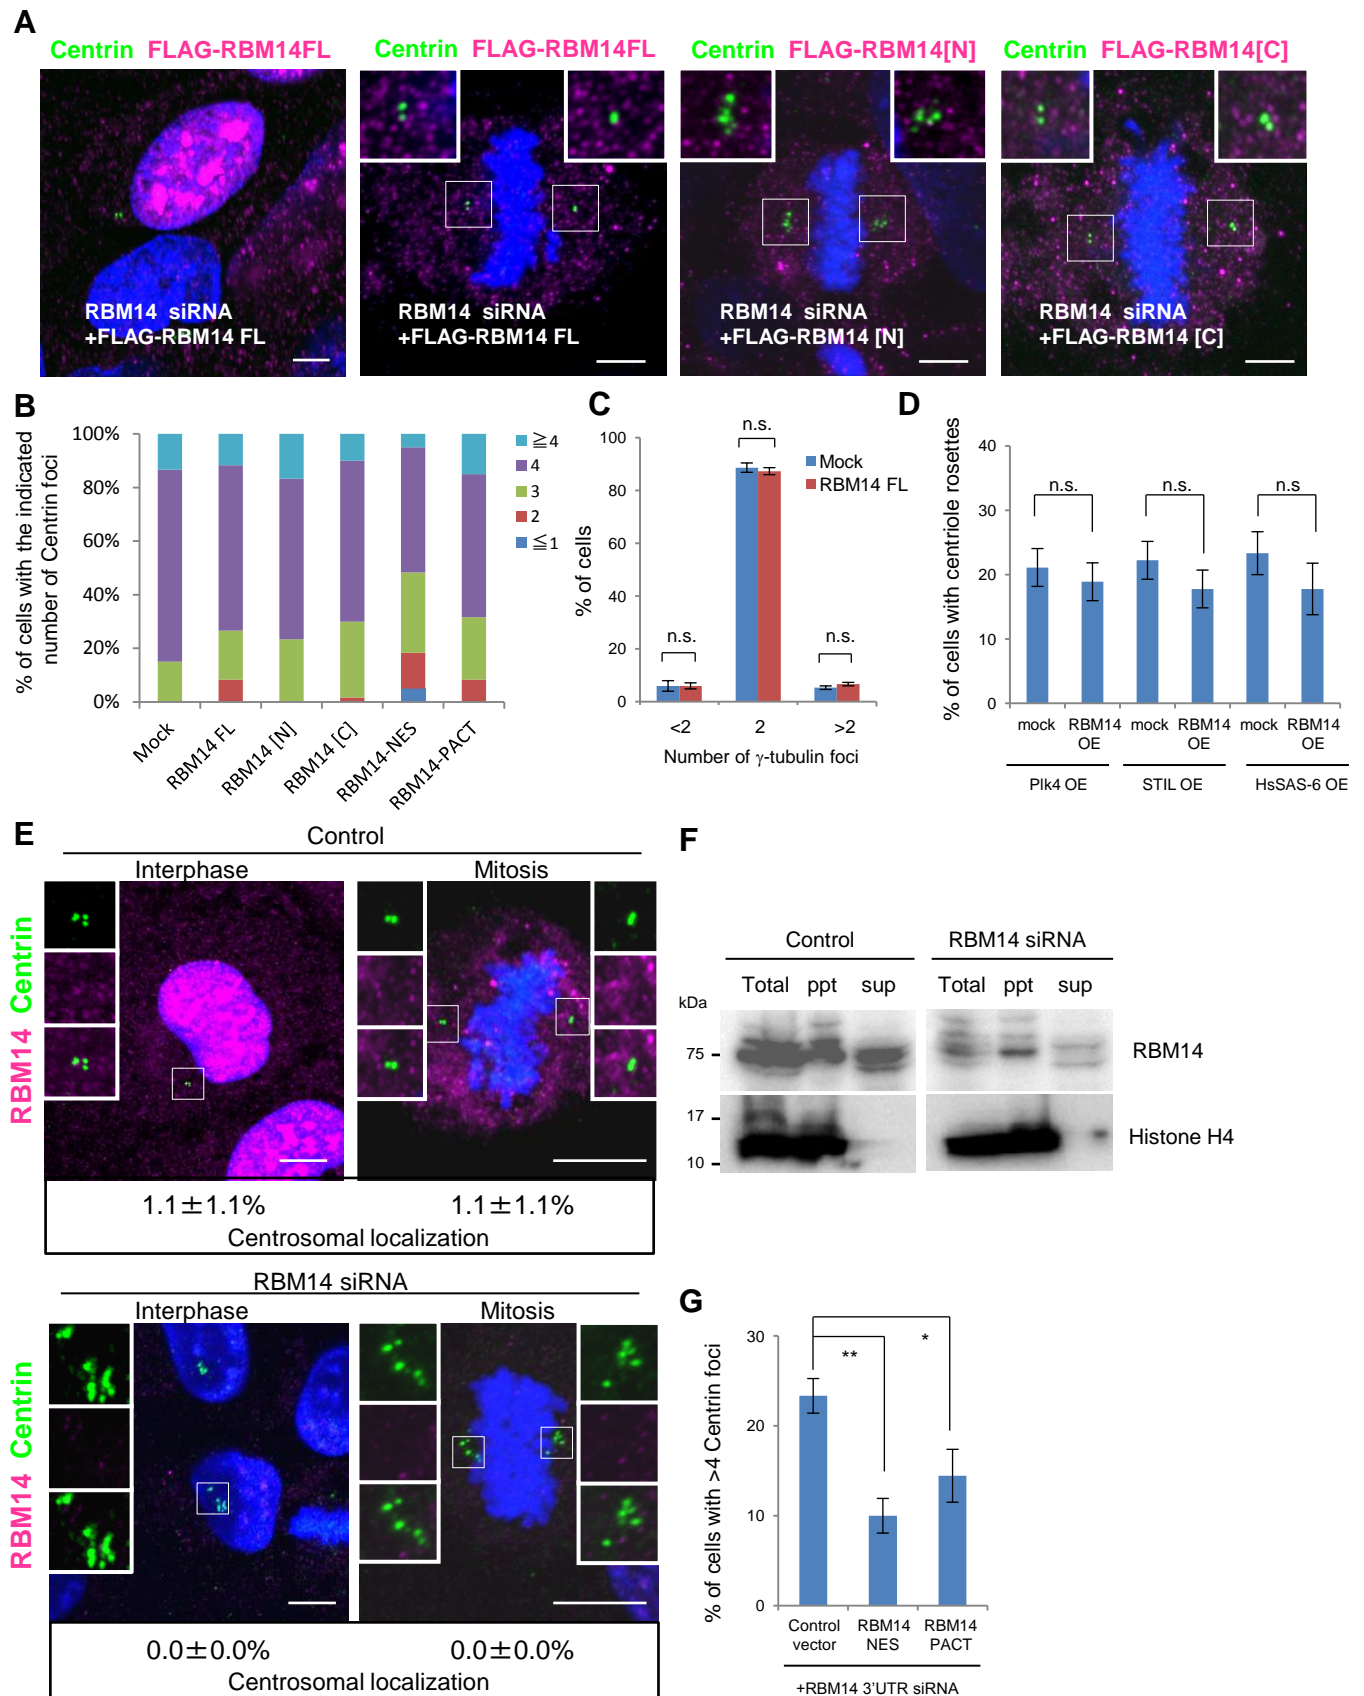



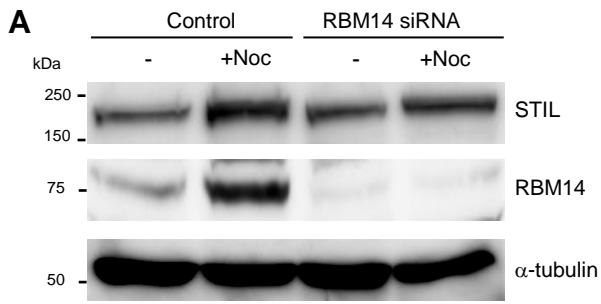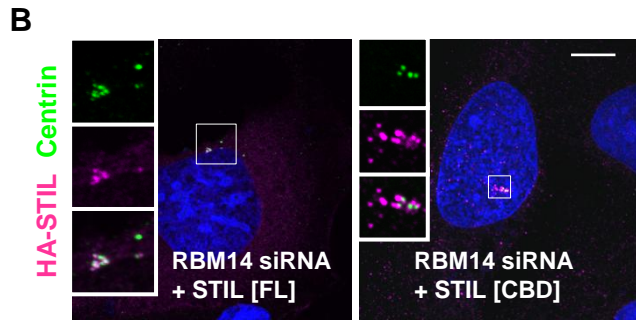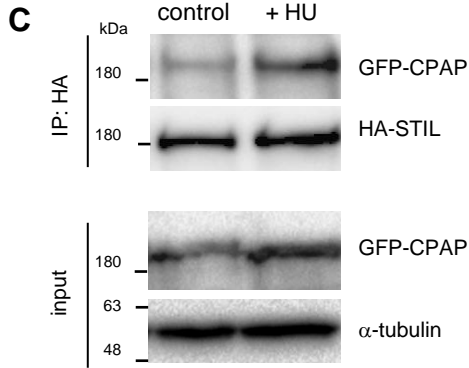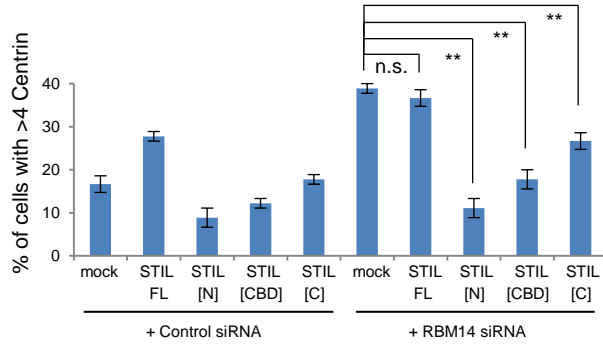

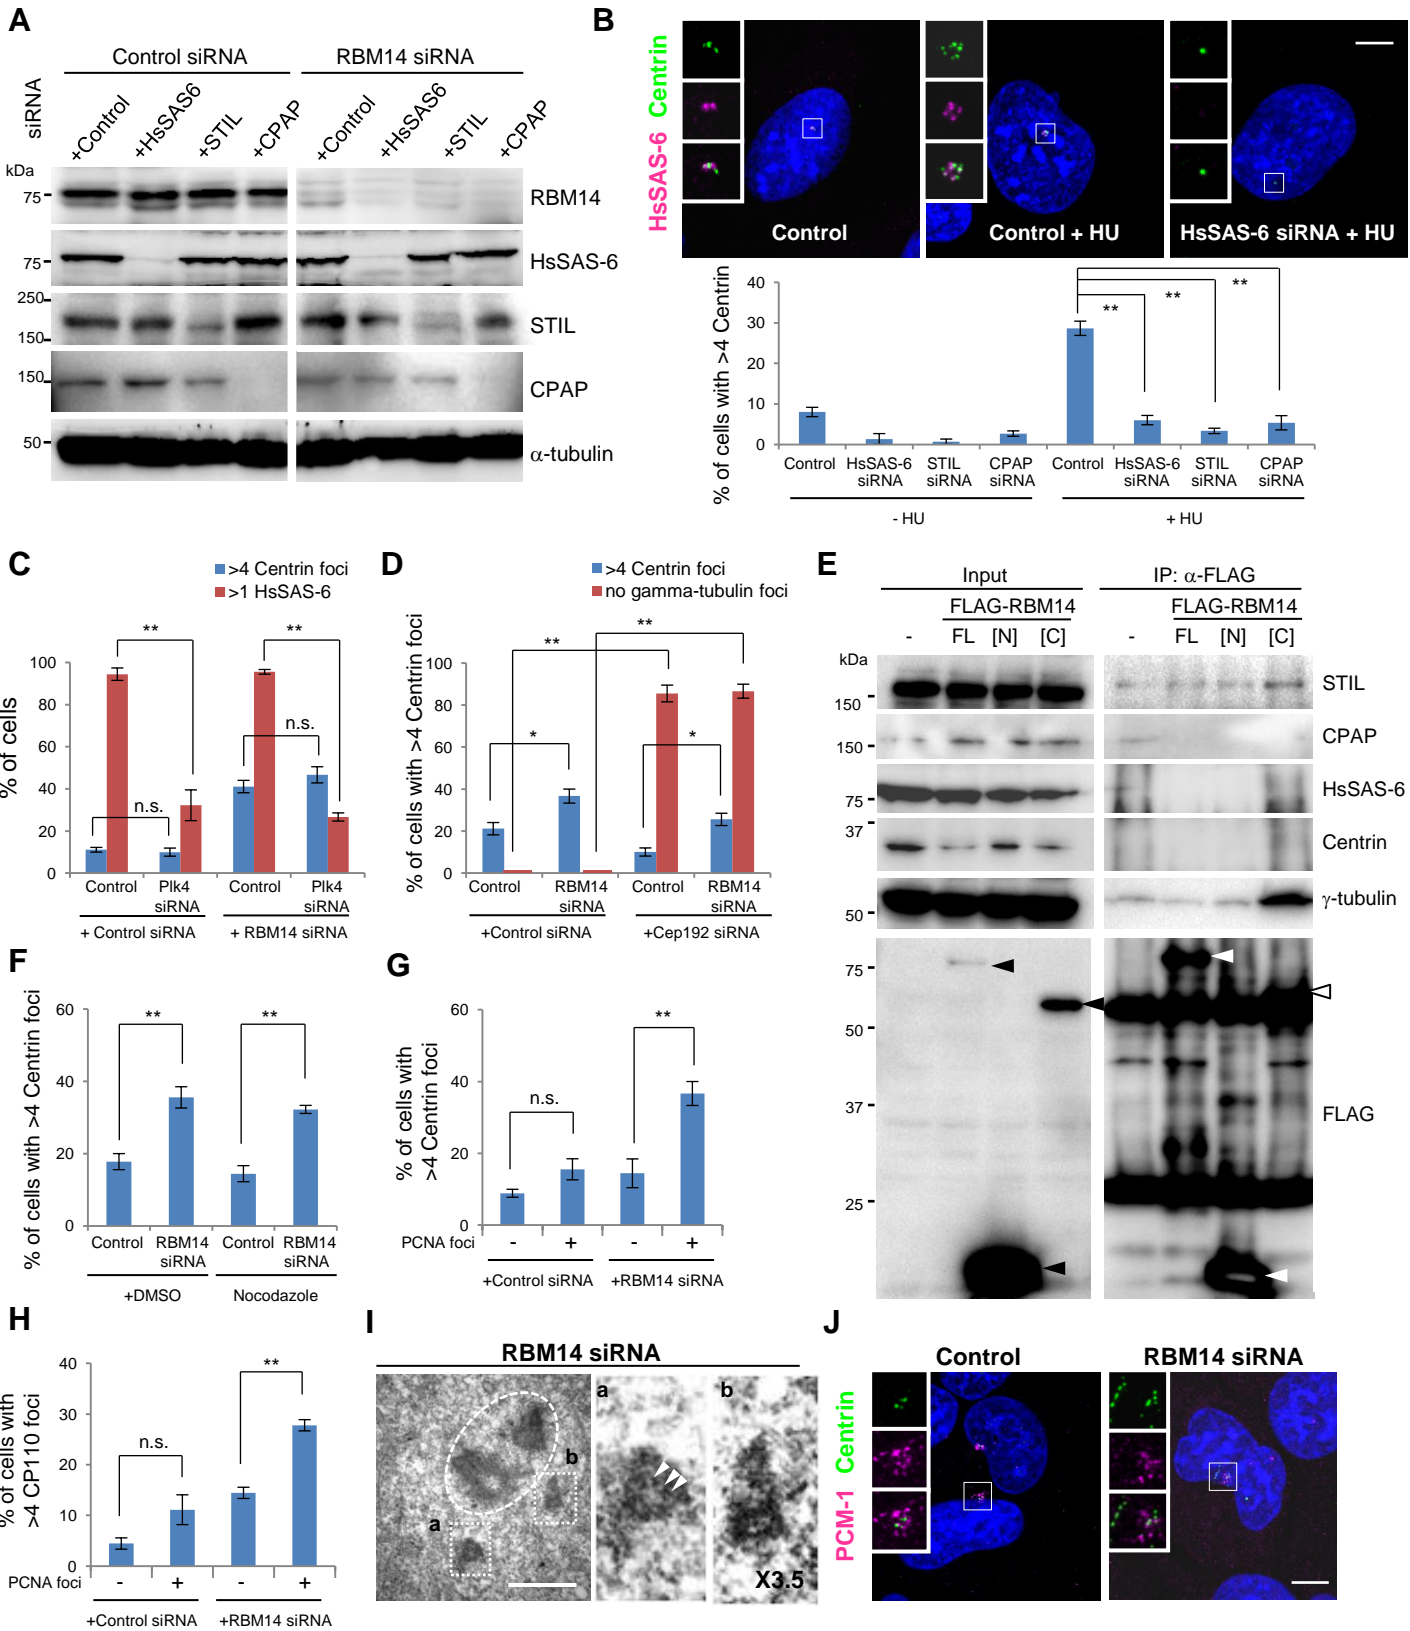

**A**

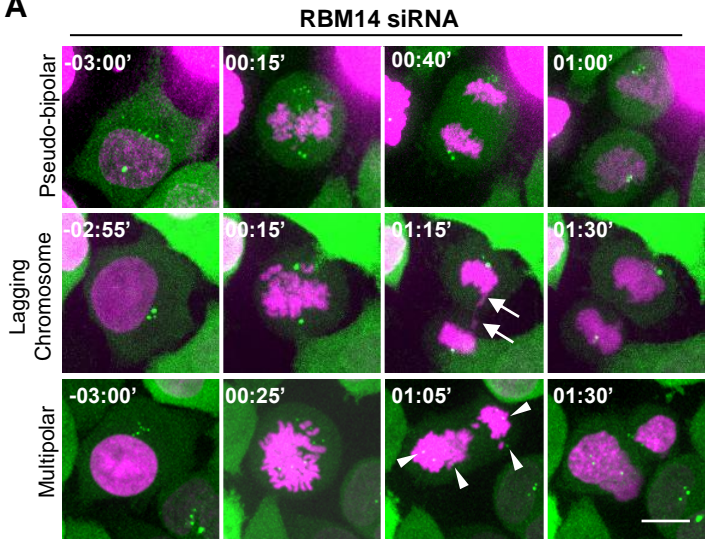

**B**

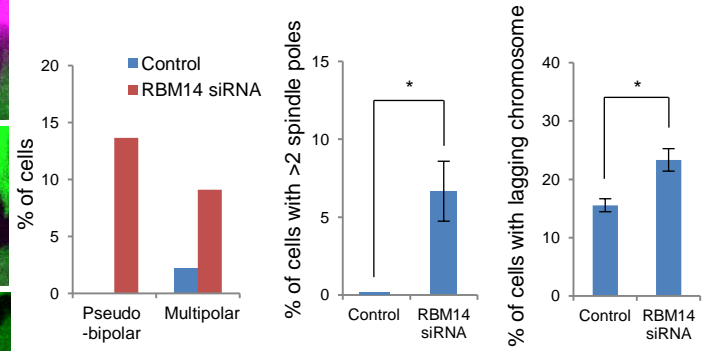

**C**

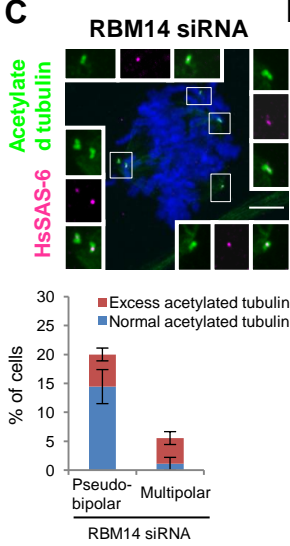

**D**

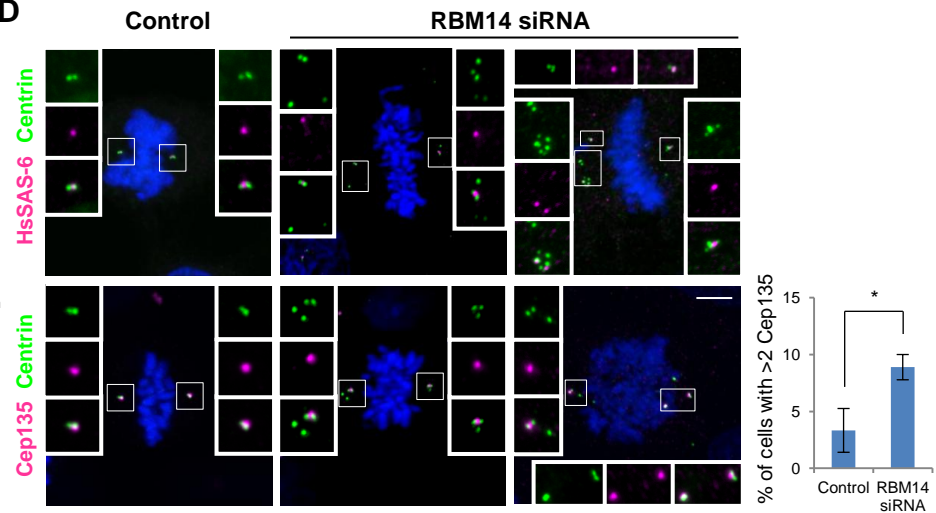

**E**

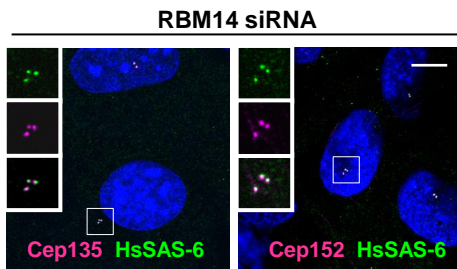

**A**

RBM14 siRNA + HsSAS-6 overexpression

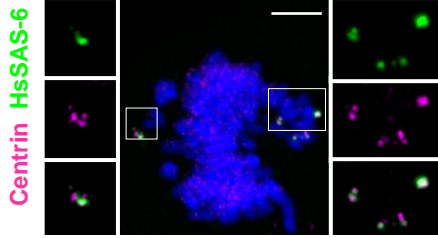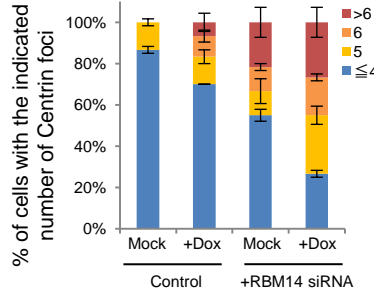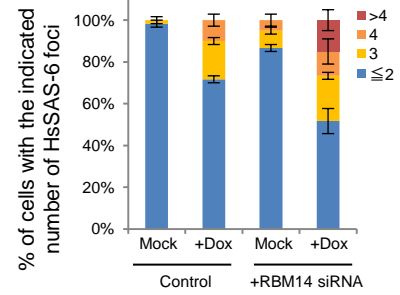

**B**

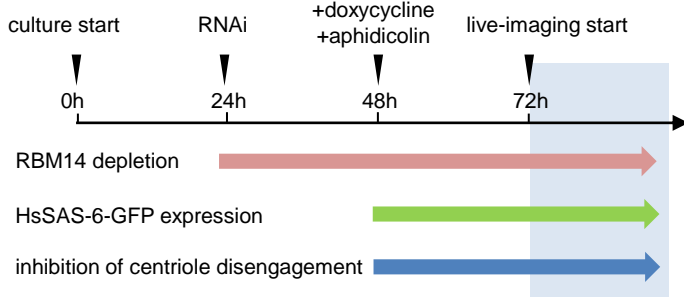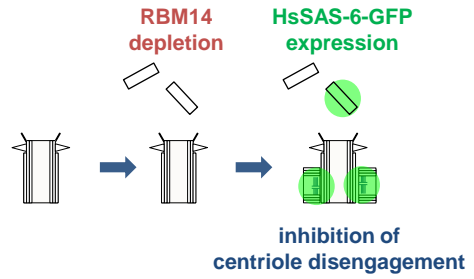

**C**

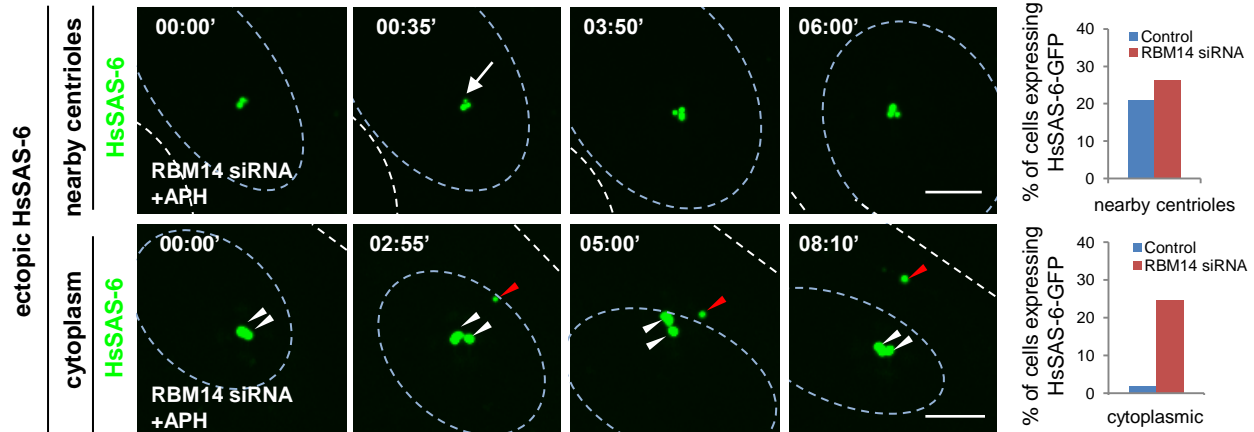

**D**

HsSAS-6 overexpression

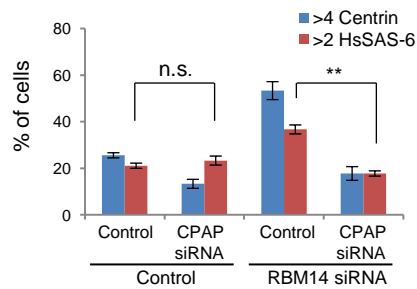



**A**

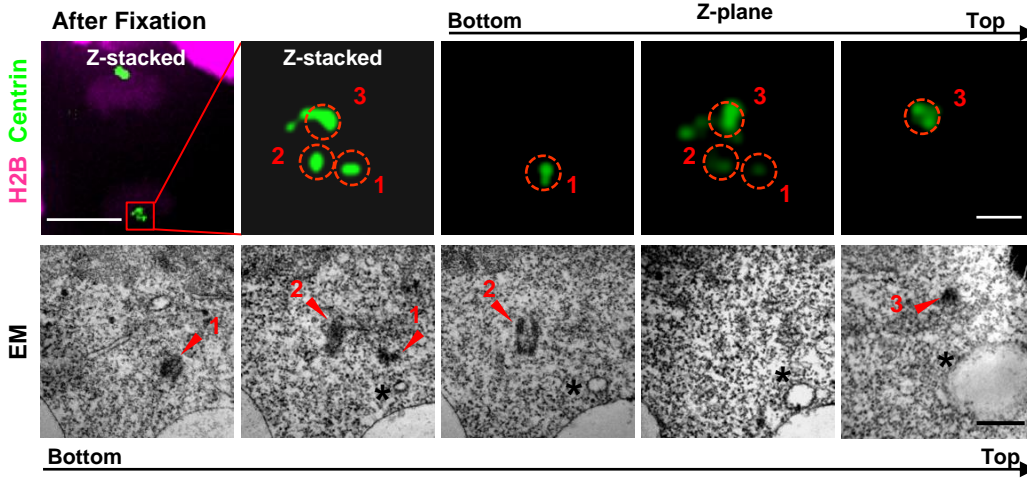

**B**

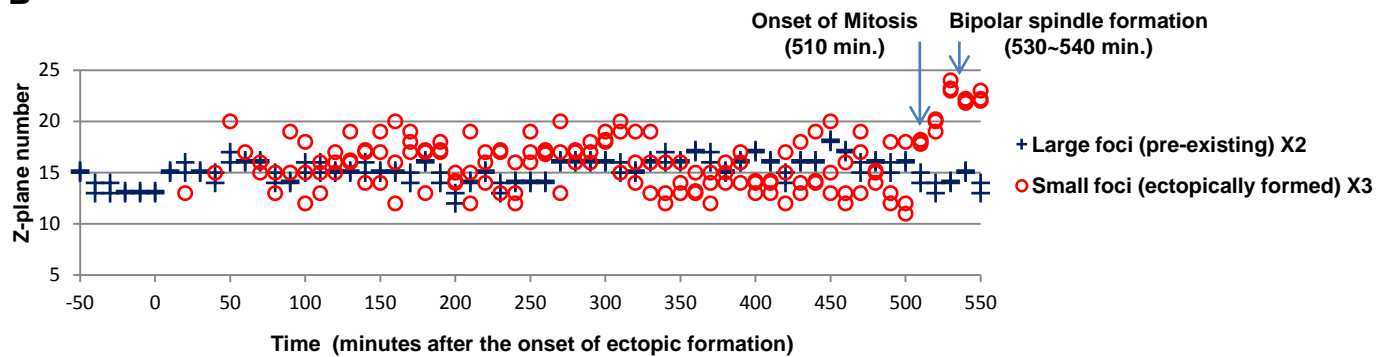

**C**

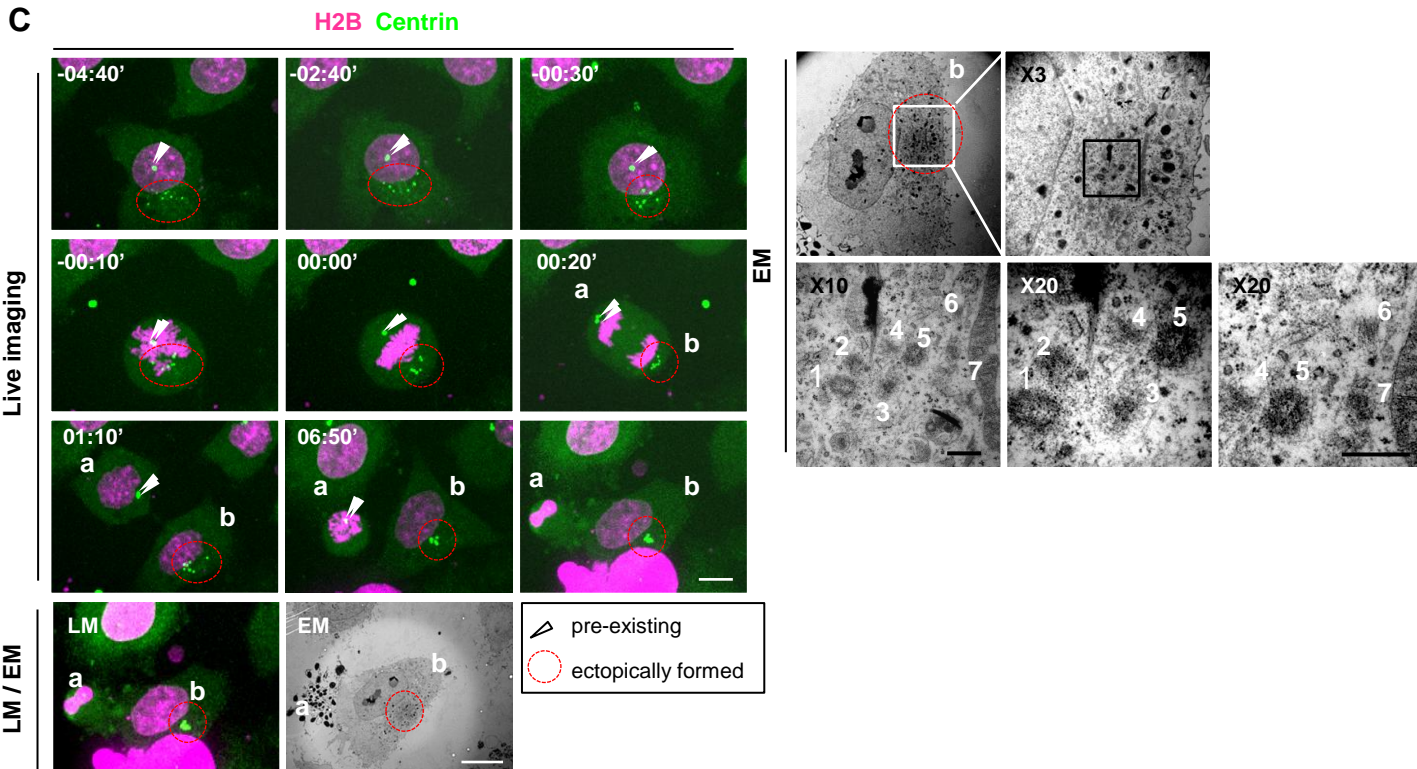

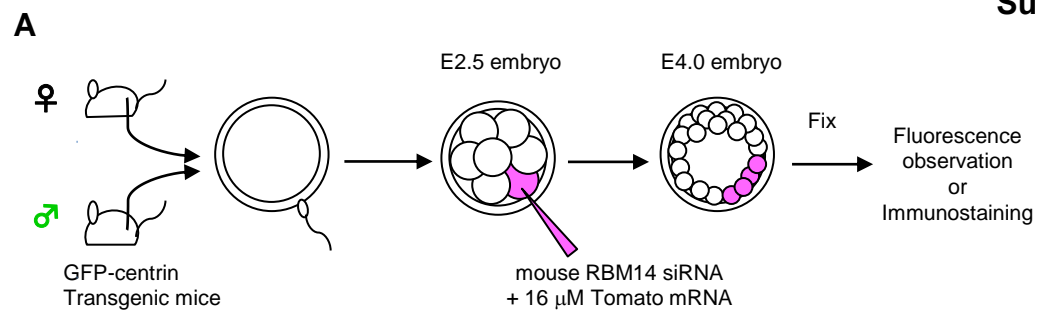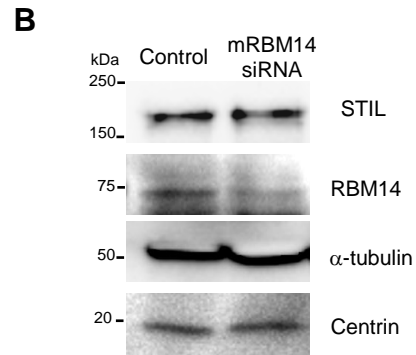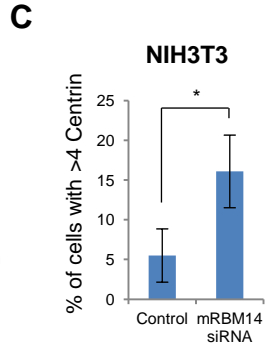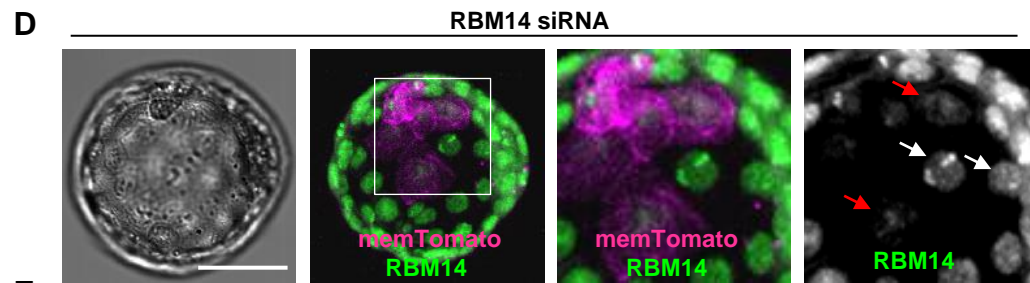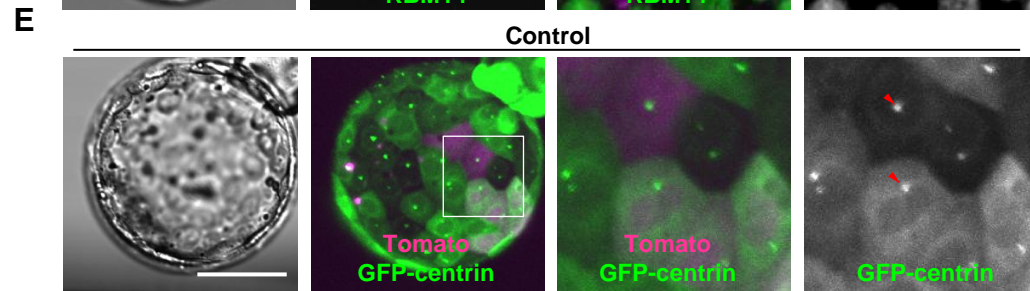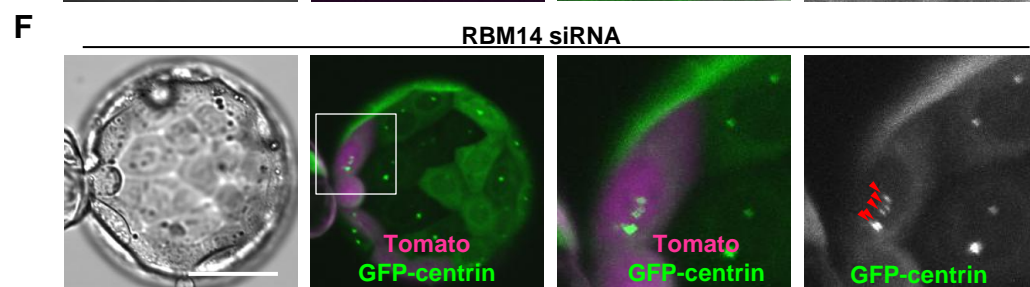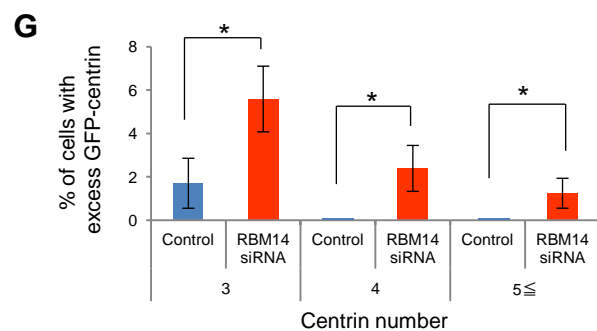

Supplement: embj0034-0097-sd1.pdf [file embj0034-0097-sd1.pdf]
